# Supplementary material for: An Evaluation of Laminarin Additive in the Diets of Juvenile Largemouth Bass (Micropterus salmoides): Growth, Antioxidant Capacity, Immune Response and Intestinal Microbiota
Source: MDPI journal article supplement (doi:10.3390/ani13030459), 2023-01-28
Supplement: s1 [file s1]

Table S1 Raw reads and clean reads of 16 sRNA sequence

| Sample ID | Raw Reads | Clean Reads | Denoised Reads | Merged Reads | Non-chimeric Reads |
|-----------|-----------|-------------|----------------|--------------|--------------------|
| Con1      | 66515     | 66430       | 65571          | 61885        | 56437              |
| Con2      | 119527    | 119090      | 117788         | 113086       | 106847             |
| Con3      | 44872     | 44808       | 44135          | 41141        | 37515              |
| Con4      | 80011     | 79910       | 79060          | 75525        | 69442              |
| HL1       | 71167     | 70886       | 69317          | 68594        | 67321              |
| HL2       | 74220     | 74011       | 70841          | 70024        | 68381              |
| HL3       | 100054    | 99671       | 94797          | 94180        | 92289              |
| HL4       | 94719     | 94291       | 93388          | 92282        | 90979              |
| LL1       | 50471     | 50397       | 37445          | 33427        | 31271              |
| LL2       | 79888     | 79800       | 57344          | 51351        | 49217              |
| LL3       | 80050     | 79957       | 57627          | 51147        | 48213              |
| LL4       | 45528     | 45472       | 33742          | 29878        | 28485              |
