# Supplementary material for: An Evaluation of Laminarin Additive in the Diets of Juvenile Largemouth Bass (Micropterus salmoides): Growth, Antioxidant Capacity, Immune Response and Intestinal Microbiota
Source: MDPI journal article supplement (doi:10.3390/ani13030459), 2023-01-28
Supplement: s1 [file s1]

Table S2 The Firmicutes/Bacteroidetes ratio

|                                | Con         | LL          | ML          | HL          |
|--------------------------------|-------------|-------------|-------------|-------------|
| Firmicutes                     | 0.143525381 | 0.332473935 | 0.086984506 | 0.064129049 |
| Bacteroidota                   | 0.102547391 | 0.083171084 | 0.098994172 | 0.003366488 |
| Firmicutes/Bacteroidetes ratio | 1.399600508 | 3.997470266 | 0.878683098 | 19.04924242 |
